# Supplementary material for: A novel rhesus macaque model of Huntington’s disease recapitulates key neuropathological changes along with motor and cognitive decline
Source: eLife. 2022 Oct 7;11:e77568. doi: 10.7554/eLife.77568 (PMC9545527; doi:10.7554/eLife.77568)
Supplement: Figure 1—source data 1. — Table 1 reports scores from all the behavioral tasks at each of the post-surgical timepoints, as well as overall averages. All scores are reported as change from baseline measures. [file elife-77568-fig1-data1.xlsx]

## Sheet: Figure 1 - source data
Table 1
Animal Code	Group	Spatial Delayed Response (% correct) - change from baseline							Lifesave Retrieval Latencies (seconds) - change from baseline							Neurological Rating Scale (NRS) scores - change from baseline
		3m	6m	9m	14m	20m	30m	Average	3m	6m	9m	14m	20m	30m	Average	0.5m	1m	2m	3m	4m	5m	6m	7m	8m	9m	10m	11m	12m	13m	14m	15m	16m	17m	18m	19m	20m	21m	22m	23m	24m	25m	26m	27m	28m	29M	30M	Average	Apomorpine_3m	Apomorpine_6m
1	85Q	-16.67	-4.17	-16.67	-10.42	-8.33	-22.5	-13.1267	0.585	0.142	0.03	-0.035	-0.048	-0.053	0.1035	0	0	0	0.5	0	4	2	4	4	3	3	6	7	6	6	5	9	6	5	8	3	4	3	4	6	8	5	5	7	8	7	4.46774	3	3
2	85Q	-10.42	-16.67	-20.83	-10.42	2.08	-10.42	-11.1133	0.093	-0.042	0.075	-0.058	-0.058	-0.298	-0.048	0	0	1	1	2	1	1	1	3	3	7	7	5	5	6	5	4	5	5	5	4	6	5	5	4	5	5	7	6	6	6	4.06452	2	4
3	10Q	-2.08	0	6.25	4.17	2.08	1.25	1.945	-0.09	-0.258	-0.537	-0.425	-0.678	-0.59	-0.429667	0	0	0	0	0	0	0	0	0	2	1	0	0	0	2	2	0	0	0	0	2	2	2	0	0	0	0.5	0	0	0	2	0.5	0	0
4	85Q	6.25	2.08	-6.25	-4.17	0	-18.33	-3.40333	0.235	-0.043	0.142	-0.005	0.123	0.263	0.119167	0	0	1	1	0	1	1.5	0	3	1	3	2	3	2	3	3	3	3	4	6	4	4	5	7	6	4	5	7	2	2	4	2.91935	1	7
5	10Q	-10.42	-4.17	-12.5	2.08	-4.17	3.33	-4.30833	-0.162	-0.342	-0.22	-0.373	-0.282	-0.485	-0.310667	0	0	0	0	0	0	0	0	0	0	0	0	0	0	0	0	0	0	0	0	0	0	0	0	0	0	0	0	0	0	0	0	0	0
6	Buf	-2.08	6.25	10.42	6.25	2.08	11.25	5.695	-0.02	-0.487	-0.437	-0.498	-0.492	-0.808	-0.457	2	1.5	0.5	0	0	0	0	0	0	0	0	0	0	0	0	0	0	0	0	0	0	0	0	0	0	0	0	0	0	0	0	0.129032	0	0
7	10Q	-4.17	6.25	6.25	2.08	4.17	9.58	4.02667	-0.177	-0.16	-0.332	-0.163	-0.342	-0.425	-0.2665	0	0	0	0	0	0	0	0	0	1	0	0	0	0	0	0	0	0	1	1	0	2	0	0	2	0	1	0	0	2	1	0.354839	0	0
8	Buf	-	-	-	-	-	-	-	-0.05	-0.397	-0.587	-0.638	-0.618	-0.612	-0.483667	0	0	0	0	0	0	0	0	0	0	0	2	0	0	0	0	0	2	0	0	1	0	0	0	0	0	0	0	0	0	0	0.16129	2	1
9	Buf	4.17	14.58	6.25	20.83	20.83	24.58	15.2067	-0.338	-0.568	-0.603	-0.668	-0.605	-0.633	-0.569167	2	0.5	0.25	0	0	0	0	0	0	0	0	0	0	0	0	0	0	0	0	0	0	0	0	0	0	0	0	0	0	0	0	0.0887097	0	0
10	10Q	7.64	7.64	-0.69	-0.69	22.22	19.31	9.23833	-0.111	-0.467	-0.387	-0.232	-0.438	-0.424	-0.343167	0	0	0	0	0	1	0	0	0	0	0	0	0	0	0	0	0	0	0	0	0	0	0	0	0	0	0	2	0	0	0	0.0967742	1	0
11	85Q	-14.58	-16.67	-8.33	-6.25	0	20.83	-4.16667	0.131	-0.024	-0.204	0.732	-0.056	-0.218	0.0601667	0	0	0	2	2.5	2	3	3	3	7	4	4	6	6	9	6	7	5	6	7	7	6	5	4	5	5	4	6	7	6	7	4.66129	4	4
12	85Q	-12.5	-18.75	-25	-14.58	-12.5	-10.42	-15.625	-0.295	-0.517	-0.393	-0.79	-0.767	-0.803	-0.594167	0	0	0	3	1	5	3	5	5	3	4	7	5	8	8	6	9	7	5	6	7	6	6	5	5	5	5	8	6	7	7	5.06452	7	5
13	Buf	8.33	10.42	14.58	14.58	20.83	25	15.6233	-0.672	-0.749	-0.824	-1.033	-1.116	-1.094	-0.914667	0	0	0	0	0	0	0	0	0	0	0	0	0	0	0	0	0	0	0	0	0	0	0	0	0	0	0	0	1	0	0	0.0322581	0	0
14	85Q	4.17	0	-8.33	-16.67	-14.58	-	-7.082	-0.033	-0.068	0.052	-0.003	-0.225	-	-0.0554	0	0	0	0	1	2	1	2	2	2	2	6	5	3	7	6	6	5	4	5	5	6	4	7	5	4.5	-	-	-	-	-	3.48077	1	3
15	Buf	4.17	6.25	8.33	6.25	6.25	7.5	6.45833	-0.528	-0.767	-0.777	-0.86	-1.048	-0.942	-0.820333	0	0	0	0	0	0	0	0	0	1	0	0	0	0	0	1	2	2	1	0	0	0	0	0	0	0	0	0	1	0	0	0.258065	1	1
16	10Q	4.17	-6.25	12.5	12.5	4.17	6.67	5.62667	0.213	-0.125	-0.353	-0.253	-0.327	-0.313	-0.193	0	0	0	0	0	0	0	0	1	0	0	2	0	1	2	1	0	2	0	0	1	3	2	2	3	4	0	0	0	0	0	0.774194	0	0
17	10Q	-	-	-	-	-	-	-	-0.258	-0.686	-0.871	-0.8	-0.87	-0.706	-0.6985	-1	-1	-1	-1	-1	-1	-1	-1	-1	-1	-1	-1	-1	-1	-1	-1	-1	0	0	-1	-1	0	0	0.5	1	0.5	-1	-1	-1	0	1	-0.612903	-1	1
[truncated: 3 more columns]
