# Supplementary material for: A novel rhesus macaque model of Huntington’s disease recapitulates key neuropathological changes along with motor and cognitive decline
Source: eLife. 2022 Oct 7;11:e77568. doi: 10.7554/eLife.77568 (PMC9545527; doi:10.7554/eLife.77568)
Supplement: Figure 2—source data 1. — Table 1 reports the percent volume of regions of interest (ROIs) that had p < 0.01 significant changes in fractional anisotropy (FA) identified by voxel-wise analyses in Group 85Q. Both control groups (10Q and Buffer) did not have any significant (p < 0.01) changes and are not included in this table. Table 2 reports the average change in FA (from baseline) under the p < 0.01 voxels at each timepoint, for all 17 animals on study. These data were also averaged across timepoint and correlated with average behavioral scores (also included in Table 2). [file elife-77568-fig2-data1.xlsx]

## Sheet: Figure 2 - source data
Table 1								Table 2
% volume per ROI of p<0.01 voxels in group 85Q								Animal Code	Group	Average change in FA from baseline under p<0.01 voxels							Average behavior scores - change from baseline
ONPRC 18 WM ROIs	3m	6m	9m	14m	20m	30m				3m	6m	9m	14m	20m	30m	Average	avg_SDR	avg_Lifesaver	avg_NRS
VPF	17.641	31.5897	17.641	38.6667	32.5128	28.2051		1	85Q	-0.0362227	-0.0352085	-0.0327456	-0.0392472	-0.0349537	-0.0322891	-0.0351111	-13.1267	0.1035	4.46774
DPF	13.8453	30.9356	14.927	25.2028	21.5522	24.7431		2	85Q	-0.0323009	-0.0360748	-0.0326834	-0.0438064	-0.0341751	-0.0349486	-0.0356649	-11.1133	-0.048	4.06452
IFG	12.4257	20.1565	15.7433	14.6166	18.0282	16.3693		3	10Q	-0.0235228	-0.015063	-0.0142983	-0.012333	-0.0093363	-0.0076555	-0.0137015	1.945	-0.429667	0.5
ACR	21.7399	25.0831	13.8806	20.8822	18.3441	17.784		4	85Q	-0.0362265	-0.0361618	-0.0369648	-0.0283381	-0.0368174	-0.029544	-0.0340088	-3.40333	0.119167	2.91935
SCR	18.1999	26.3269	24.3812	19.2985	24.2488	25.1886		5	10Q	-0.0103553	-0.0124296	-0.0114405	-0.0143516	-0.0035622	-0.0074829	-0.00993702	-4.30833	-0.310667	0
PCR	6.67071	3.92662	10.2638	7.73196	8.73257	13.8417		6	Buf	-0.0174713	-0.012787	-0.0121906	-0.0167012	-0.0030987	-0.0111063	-0.0122258	5.695	-0.457	0.129032
DPCR	4.87056	7.11236	6.80544	7.53936	5.59114	9.14065		7	10Q	-0.0137963	-0.0231873	-0.0120647	-0.0259561	-0.0080645	-0.0050661	-0.0146892	4.02667	-0.2665	0.354839
EC	10.4177	14.6332	14.3912	14.6332	13.1814	19.6001		8	Buf	-0.0127759	-0.0166949	-0.0207683	-0.0138526	-0.0102593	-0.0129407	-0.0145486	-	-0.483667	0.16129
ALIC	9.39948	5.55424	5.41182	8.4263	9.35201	7.35818		9	Buf	-0.0059847	-0.0149765	-0.0150335	-0.0087261	-0.0001384	-0.0062374	-0.0085161	15.2067	-0.569167	0.0887097
PLIC	3.22581	5.13942	4.22818	8.18298	5.86842	10.0966		10	10Q	-0.0124053	-0.0041134	-0.0113243	-0.0117485	-0.003434	-0.0091347	-0.00869337	9.23833	-0.343167	0.0967742
RLIC	2.88754	1.63374	6.61094	1.74772	5.12918	5.20517		11	85Q	-0.0297774	-0.031962	-0.0367606	-0.0299981	-0.0330775	-0.0363525	-0.032988	-4.16667	0.0601667	4.66129
GCC	11.8708	18.4552	16.9991	24.1849	19.5315	12.2191		12	85Q	-0.0304134	-0.0311125	-0.0388164	-0.0299938	-0.028834	-0.0280963	-0.0312111	-15.625	-0.594167	5.06452
BCC	17.0791	19.6279	18.6419	21.4326	19.1814	12.0558		13	Buf	-0.0162539	-0.0070408	-0.0097765	-0.0075595	-0.0088116	-0.0061198	-0.00926035	15.6233	-0.914667	0.0322581
SCC	2.97603	2.18594	7.18989	2.34396	10.1923	14.7485		14	85Q	-0.058999	-0.0374274	-0.041882	-0.0397788	-0.0397007	-	-0.0435576	-7.082	-0.0554	3.48077
SFOF	14.8289	10.4563	2.6616	8.74525	4.94297	12.3574		15	Buf	-0.0108438	-0.0078772	-0.0045405	0.00415891	-0.0117159	0.00280718	-0.00466855	6.45833	-0.820333	0.258065
SLF	8.91378	13.3585	10.3751	3.95762	12.6157	13.7847		16	10Q	-0.0178126	-0.0188487	-0.0147681	-0.0099715	-0.012308	-0.0109888	-0.0141163	5.62667	-0.193	0.774194
ST	0.90834	4.34902	5.89045	2.14699	3.33058	3.55078		17	10Q	-0.0091488	-0.0165367	-0.0056636	-0.0057942	-0.0047229	-0.0055232	-0.00789823	-	-0.6985	-0.612903
SC	5.56708	8.05671	7.98755	11.6874	10.7538	19.2254
PCR	4.27648	1.64097	3.87867	1.79015	2.38687	0.09945
UF	1.73112	6.593	6.96133	3.75691	1.03131	6.44567
Fornix	2.82638	7.80619	6.19112	1.3459	0.26918	11.7093
AC	0.95448	0.07342	0	0.07342	0.07342	1.98238
CT	0	0.19508	0.97542	0	0.4682	0.07803
