# Supplementary material for: A novel rhesus macaque model of Huntington’s disease recapitulates key neuropathological changes along with motor and cognitive decline
Source: eLife. 2022 Oct 7;11:e77568. doi: 10.7554/eLife.77568 (PMC9545527; doi:10.7554/eLife.77568)
Supplement: Figure 3—source data 1. — Table 1 reports the percent volume of regions of interest (ROIs) that had p < 0.01 significant changes in log Jacobian Determinants identified by voxel-wise analyses in Group 85Q. Both control groups (10Q and Buffer) did not have any significant (p < 0.01) changes and are not included in this table. Table 2 reports the average change in log JD (from baseline) under the p < 0.01 voxels at each timepoint, for all 17 animals on study. These data were also averaged across timepoint and correlated with average behavioral scores (also included in Table 2). [file elife-77568-fig3-data1.xlsx]

## Sheet: Figure 3 - source data
Table 1								Table 2
% volume per ROI of p<0.01 voxels in group 85Q								Animal Code	Group	Average change in log jacobian determinant from baseline under p<0.01 voxels							Average behavior scores - change from baseline
ONPRC18 GM ROIs	3m	6m	9m	14m	20m	30m				3m	6m	9m	14m	20m	30m	Average	avg_SDR	avg_Lifesaver	avg_NRS
DLPFC	31.8265	40.918	50.3011	41.888	44.5255	44.0309		1	85Q	0.0633768	0.0579874	0.0650784	0.0699488	0.0674337	0.0613425	0.0641946	-13.1267	0.1035	4.46774
VLPFC	2.68512	8.45564	23.3823	20.4136	11.8746	12.3249		2	85Q	0.0610991	0.0639626	0.0588955	0.0675302	0.0732421	0.0562902	0.0635033	-11.1133	-0.048	4.06452
OPFC	4.47012	11.7194	13.5778	26.1678	12.1882	26.0338		3	10Q	0.0347274	0.038636	0.0365025	0.0422984	0.0468035	0.035631	0.0390998	1.945	-0.429667	0.5
VMPFC	5.36862	15.3497	15.3119	13.3081	15.8034	21.172		4	85Q	0.045605	0.0474391	0.0548624	0.0608738	0.0565769	0.0619274	0.0545474	-3.40333	0.119167	2.91935
DMPFC	41.7482	44.178	43.8309	47.7438	44.3989	64.9732		5	10Q	0.02433	0.0373999	0.0383033	0.0306458	0.0382298	0.0373565	0.0343775	-4.30833	-0.310667	0
ACC	19.1685	20.2723	23.6387	30.0589	25.0368	29.0103		6	Buf	0.0160367	0.0309803	0.0329961	0.0325444	0.0383582	0.0308	0.0302859	5.695	-0.457	0.129032
DPMC	49.4777	43.7322	45.5207	44.666	43.0833	37.2111		7	10Q	0.0342756	0.0370106	0.0387641	0.0454861	0.0376064	0.0362636	0.0382344	4.02667	-0.2665	0.354839
VPMC	5.95154	16.4943	6.07907	16.225	20.2069	7.56695		8	Buf	0.0192223	0.0283601	0.0294127	0.0307082	0.0428271	0.0346561	0.0308644	-	-0.483667	0.16129
SMC	40.5608	40.4015	35.9726	36.4983	36.9125	28.7717		9	Buf	0.0297376	0.0367864	0.0449135	0.0553986	0.0458848	0.0464237	0.0431908	15.2067	-0.569167	0.0887097
MC	10.808	14.5743	23.7731	20.6916	9.66674	12.8852		10	10Q	0.0279903	0.0338735	0.0389031	0.0395419	0.0443635	0.0415623	0.0377058	9.23833	-0.343167	0.0967742
STC	1.07617	3.15601	2.95756	6.10594	2.25156	13.2384		11	85Q	0.0396683	0.0511972	0.0487475	0.0542836	0.0578286	0.0496885	0.0502356	-4.16667	0.0601667	4.66129
ITC	0.601293	2.93413	4.83747	3.31841	5.77784	12.921		12	85Q	0.0397048	0.0461454	0.0479532	0.0401996	0.04721	0.046095	0.0445513	-15.625	-0.594167	5.06452
RC	0	0.498063	4.86995	4.03985	4.92529	4.53791		13	Buf	0.0278398	0.03052	0.0320173	0.030143	0.0413842	0.031505	0.0322349	15.6233	-0.914667	0.0322581
IC	0.625944	0.0215843	0.15109	0	0	2.82754		14	85Q	0.0411211	0.0513045	0.0481481	0.0488531	0.0557914	-	0.0490436	-7.082	-0.0554	3.48077
SSC	1.92049	5.02529	5.31976	8.13008	4.62838	9.13514		15	Buf	0.0149413	0.018853	0.0255574	0.0369569	0.0295175	0.0305519	0.026063	6.45833	-0.820333	0.258065
PC	1.68669	0.866772	1.0843	0.465179	4.02597	4.47776		16	10Q	0.0273663	0.032566	0.0320188	0.0379486	0.0429595	0.0338558	0.0344525	5.62667	-0.193	0.774194
PCC	15.0132	1.12063	2.4555	2.57086	1.31839	0.0164799		17	10Q	0.0309924	0.0438414	0.0410111	0.0424322	0.0508107	0.0376681	0.041126	-	-0.6985	-0.612903
OCC	0.445236	0.477887	0.580291	1.25111	1.15019	2.1683
CD	34.8315	37.6038	44.4309	41.6097	44.8095	4.39668
PUT	40.7045	46.9262	53.008	49.4692	51.2304	34.8284
GPE	35.3204	28.2238	47.2425	39.0916	29.116	4.13625
GPI	16.6225	32.8028	35.5438	30.7692	15.5615	0.972591
SN	0	7.05882	7.52941	4.23529	0.235294	3.05882
LatTh	1.69203	0.66894	0.93127	0.0393494	2.26915	0.170514
MdTh	8.48172	0.374883	1.73383	0	3.79569	2.57732
HIPP	0.0624707	8.12119	4.93519	1.82727	1.28065	34.2183
AMY	0	8.69018	7.02141	11.6184	6.51763	25.7242
CBM	1.79628	2.6998	7.54903	4.86895	8.0958	5.53763
LatV	1.3227	2.08131	2.37308	2.76211	2.74266	3.03443
