# Supplementary material for: A novel rhesus macaque model of Huntington’s disease recapitulates key neuropathological changes along with motor and cognitive decline
Source: eLife. 2022 Oct 7;11:e77568. doi: 10.7554/eLife.77568 (PMC9545527; doi:10.7554/eLife.77568)
Supplement: Figure 4—source data 1. — Table 1 reports the percent volume of regions of interest (ROIs) that had p < 0.01 significant changes in IC2 z-scores identified by voxel-wise analyses in Group 85Q. Both control groups (10Q and Buffer) did not have any significant (p < 0.01) changes and are not included in this table. Table 2 reports the average change in z-score (from baseline) under the p < 0.01 voxels at each timepoint, for all 17 animals on study. These data were also averaged across timepoint and correlated with average behavioral scores (also included in Table 2). [file elife-77568-fig4-data1.xlsx]

## Sheet: Figure 4 - source data
Table 1								Table 2
% volume per ROI of p<0.01 voxels in group 85Q								Animal Code	Group	Average change in IC2 z-score from baseline under p<0.01 voxels							Average behavior scores - change from baseline
ONPRC18 GM ROIs	3m	6m	9m	14m	20m	30m				3m	6m	9m	14m	20m	30m	Average	avg_SDR	avg_Lifesaver	avg_NRS
DLPFC	0.687285	0.515464	0.171821	0.687285	0.515464	1.89003		1	85Q	-0.0484382	-0.0603364	-0.100644	-0.0955225	-0.0509891	-0.0878858	-0.0739693	-13.1267	0.1035	4.46774
VLPFC	1.32743	6.19469	0.442478	1.32743	7.07965	9.29204		2	85Q	-0.0356693	-0.0658827	-0.0369988	-0.0555381	-0.0724561	-0.048566	-0.0525185	-11.1133	-0.048	4.06452
OPFC	0.45045	1.35135	0.45045	1.35135	1.8018	5.40541		3	10Q	0.0119671	0.0133791	-0.00747843	0.024509	0.00469276	0.00539209	0.0087436	1.945	-0.429667	0.5
VMPFC	0	0	1.48515	0	0.495049	0		4	85Q	-0.0750846	-0.0521474	-0.0321149	-0.0433551	-0.0694687	-0.0398269	-0.0519996	-3.40333	0.119167	2.91935
DMPFC	0	0	0	2.38095	0	1.5873		5	10Q	-0.0288044	-0.00821432	0.0146029	-0.00549837	-0.00443134	-0.00348873	-0.00597238	-4.30833	-0.310667	0
ACC	0.970874	0	0	0.485437	0	0.970874		6	Buf	0.00506617	0.031829	-0.0112378	0.0238884	0.0292764	0.0122219	0.015174	5.695	-0.457	0.129032
DPMC	0	0	2.30415	0.921659	0.460829	0		7	10Q	-0.00592014	-0.000884995	0.00606083	-0.0228223	-0.0362031	0.0107237	-0.00817433	4.02667	-0.2665	0.354839
VPMC	0	1.9305	6.17761	3.861	10.8108	10.0386		8	Buf	-0.0173127	-0.0200059	0.0172052	-0.0123673	-0.0251446	0.0140792	-0.00725768	-	-0.483667	0.16129
SMC	0	0	0	0	0	2.30769		9	Buf	-0.0022253	0.021337	0.00228249	0.00790998	0.0309714	0.0228105	0.0138477	15.2067	-0.569167	0.0887097
MC	0	0	0	0.598802	2.99401	2.99401		10	10Q	0.0352179	0.00143032	0.00135005	-0.00439462	0.0765793	0.0248762	0.0225099	9.23833	-0.343167	0.0967742
STC	0.52521	0.630252	1.47059	1.15546	4.93697	4.62185		11	85Q	-0.0428455	-0.0404277	-0.0498647	-0.0380213	-0.0453004	-0.0566269	-0.0455144	-4.16667	0.0601667	4.66129
ITC	0.47619	4.88095	4.28571	3.92857	2.97619	3.21429		12	85Q	-0.0532918	-0.0440171	-0.0428591	-0.0835771	-0.0471846	-0.056974	-0.0546506	-15.625	-0.594167	5.06452
RC	0	0	0	3.87597	0	6.97674		13	Buf	-0.0220339	-0.00792167	0.0165892	0.0178722	0.0145467	0.00458631	0.00393981	15.6233	-0.914667	0.0322581
IC	1.14286	1.14286	4.57143	5.14286	5.71429	11.4286		14	85Q	-0.0847715	-0.0642939	-0.0693221	-0.0595977	-0.0658729	-	-0.0687716	-7.082	-0.0554	3.48077
SSC	1.89873	0.843882	2.1097	3.79747	10.3376	2.74262		15	Buf	-0.0113344	-0.00869813	0.0195049	-0.00901593	0.0296627	0.020316	0.00673919	6.45833	-0.820333	0.258065
PC	0.670323	0.975015	1.46252	1.52346	3.53443	3.77818		16	10Q	-0.00371836	0.00611792	-0.00252631	0.036139	0.0162719	0.0107436	0.0105046	5.62667	-0.193	0.774194
PCC	0	0	0.904977	0.904977	0.452489	1.35747		17	10Q	0.0252225	0.0283333	0.0133309	0.0290947	0.0350788	0.0222801	0.0255567	-	-0.6985	-0.612903
OCC	0.837209	4.13953	0.790698	1.16279	2	4.32558
CD	0	1.3289	0.332226	0.332226	0.332226	0.664452
PUT	3.3557	0	3.3557	4.47427	4.47427	12.3043
GPE	2.17391	4.34783	5.43478	2.17391	4.34783	6.52174
GPI	2.5	2.5	2.5	2.5	0	17.5
SN	0	0	5.88235	5.88235	0	0
LatTh	0.363636	0	0	0.727273	1.81818	3.27273
MdTh	0	0	0	0	0	5.33333
HIPP	0	0.816327	6.53061	8.16327	0	5.71429
AMY	0	0	17.4312	0.917431	0	1.83486
CBM	0.67535	0.868307	1.39894	2.41196	0.771828	1.20598
